# Supplementary material for: Canine parvovirus 2 detection using a LSPR biosensing method with gold nanoparticles
Source: Royal Society of Chemistry journal article supplement (doi:10.1039/d2sd00114d), 2022-10-13
Supplement: d2sd00114d1.pdf [file d2sd00114d1.pdf]

## Supporting information for

### Canine parvovirus 2 detection by LSPR biosensing method with gold nanoparticles

Ana Carolina Yamakawa<sup>1\*</sup>; Caroline Rodrigues Basso<sup>1,2</sup>; Valber de Albuquerque Pedrosa<sup>2</sup> and João Pessoa Araújo Júnior<sup>1,2\*</sup>.

<sup>1</sup> Biotechnology Institute, São Paulo State University, Botucatu, SP 18607-440, Brazil.

<sup>2</sup> Chemical and Biological Sciences Department, Bioscience Institute, São Paulo State University, Botucatu, SP 18618-000, Brazil.

\*Corresponding authors

Dr. João Pessoa Araújo Junior - joao.pessoa@unesp.br

Ana Carolina Yamakawa - a.yamakawa@unesp.br

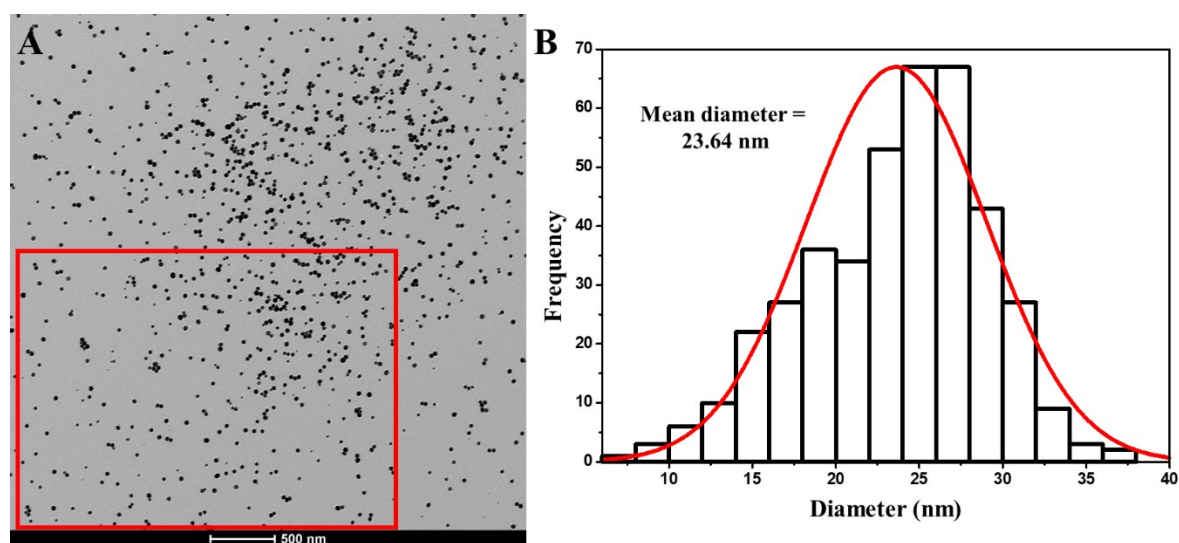

Fig. 1S AuNPs MET analyses. A) MET image at 500 nm scale. B) AuNPs diameter distribution histogram.

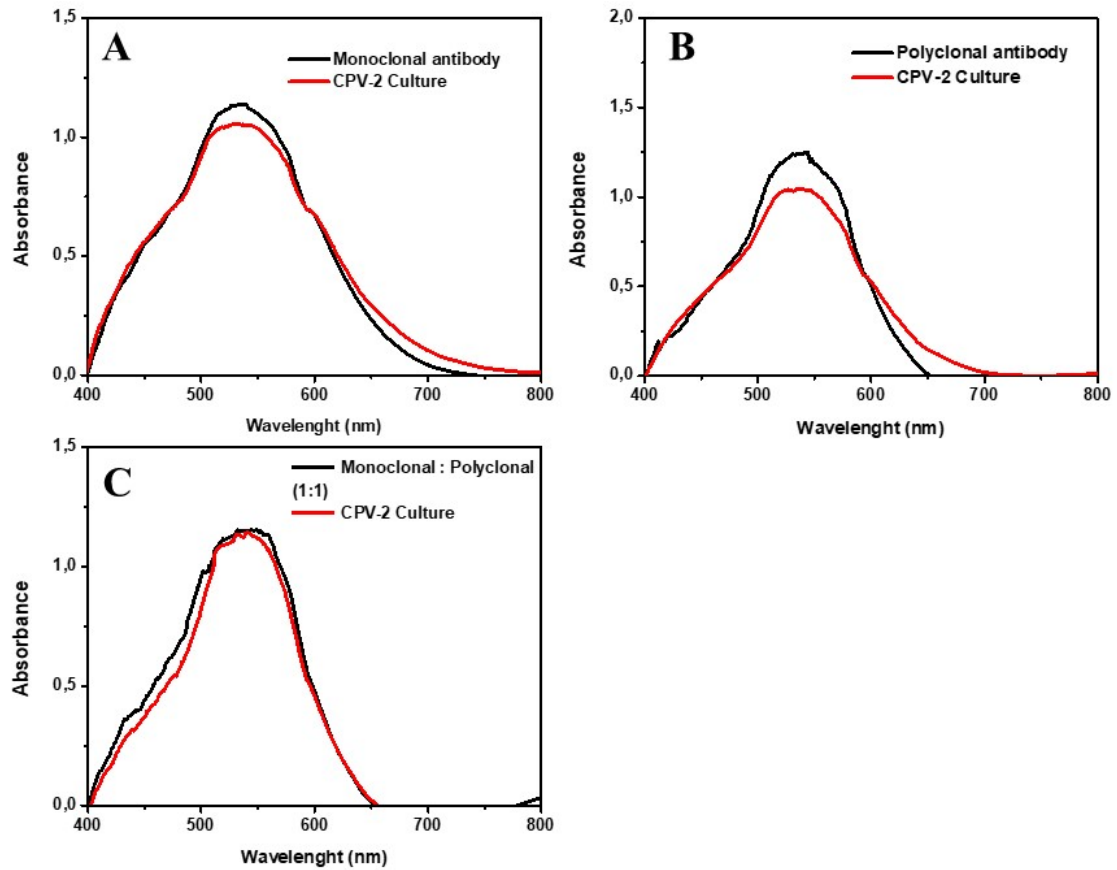

**Fig. 2S** UV-Vis spectrum analysis of the immunoglobulins and CPV-2 culture sample. A) UV-Vis graph of monoclonal immunoglobulin and viral culture sample. B) UV-Vis graph of polyclonal immunoglobulin and viral culture sample. C) UV-Vis graph of the combination of monoclonal and polyclonal immunoglobulins, and after the addition of the viral culture sample.

**Table S1.** Wavelength data of the 60 positive and five negative CPV-2 stool samples.

| Sample | Monoclonal (2,5ug/mL) |                     | Polyclonal (1:100) |                     | Monoclonal :<br>Polyclonal (1:1) |                     |
|--------|-----------------------|---------------------|--------------------|---------------------|----------------------------------|---------------------|
|        | Wavelength (nm)       | Difference*<br>(nm) | Wavelength (nm)    | Difference*<br>(nm) | Wavelength (nm)                  | Difference*<br>(nm) |
| 1      | 533.55                | 2.57                | 535.19             | 2.01                | 535.01                           | 2.96                |
| 2      | 534.37                | 3.39                | 540.14             | 6.96                | 537.02                           | 4.97                |
| 3      | 538.4                 | 7.42                | 538.57             | 5.39                | 545.71                           | 13.66               |
| 4      | 534.37                | 3.39                | 535.56             | 2.38                | 537.38                           | 5.33                |
| 5*     | 533.57                | 2.59                | 540.22             | 7.04                | 537.4                            | 5.35                |
| 6      | 535.56                | 4.58                | 538.4              | 5.22                | 538.57                           | 6.52                |
| 7      | 537.94                | 6.96                | 536.01             | 2.83                | 541.96                           | 9.91                |
| 8†     | 537.21                | 6.23                | 536.93             | 3.75                | 540.95                           | 8.9                 |
| 9      | 546.17                | 15.18               | 543.33             | 9.97                | 536.9                            | 5.01                |

|     |        |       |        |      |        |       |
|-----|--------|-------|--------|------|--------|-------|
| 10  | 534.37 | 3.02  | 535.17 | 2.76 | 533.5  | 2.24  |
| 11  | 533    | 2.01  | 537.39 | 4.03 | 542.15 | 10.26 |
| 12* | 547.82 | 16.83 | 535.56 | 2.2  | 545.35 | 13.46 |
| 13  | 533.91 | 2.92  | 536.38 | 3.02 | 539.95 | 8.06  |
| 14  | 533.54 | 2.19  | 534.67 | 2.26 | 533.35 | 2.09  |
| 15  | 539.95 | 8.96  | 535.37 | 2.01 | 544.89 | 13    |
| 16  | 541.14 | 10.15 | 538.76 | 5.4  | 543.43 | 11.54 |
| 17  | 540.13 | 9.14  | 540.22 | 6.86 | 541.96 | 10.07 |
| 18  | 541.96 | 10.97 | 535.74 | 2.38 | 546.17 | 14.28 |
| 19  | 536.93 | 5.58  | 536.34 | 3.93 | 534.92 | 3.66  |
| 20° | 550.83 | 19.48 | 542.79 | 9.61 | 541.23 | 8.51  |
| 21† | 540.22 | 8.87  | 540.04 | 6.86 | 537.57 | 4.85  |
| 22  | 552.85 | 21.5  | 537.85 | 4.67 | 539.77 | 7.05  |
| 23  | 536.02 | 4.67  | 536.59 | 4.18 | 536.59 | 5.33  |
| 24  | 536.57 | 5.22  | 541.96 | 8.78 | 539.95 | 7.23  |
| 25  | 535.74 | 4.39  | 537.75 | 4.57 | 542.96 | 10.24 |
| 26  | 533.54 | 2.19  | 534.44 | 2.03 | 534.08 | 2.82  |
| 27  | 533.36 | 2.01  | 538.26 | 5.85 | 537.43 | 6.17  |
| 28  | 535.19 | 3.84  | 536.57 | 3.39 | 550.02 | 17.3  |
| 29† | 541.23 | 9.88  | 536.93 | 3.75 | 538.21 | 5.49  |
| 30† | 534.31 | 3.27  | 534.56 | 2.07 | 535.07 | 3.62  |
| 31  | 533.43 | 2.39  | 534.56 | 2.07 | 539.22 | 7.77  |
| 32  | 534.41 | 3.37  | 535.69 | 3.2  | 536.58 | 5.13  |
| 33  | 535.69 | 4.65  | 535.29 | 2.8  | 539.72 | 8.27  |
| 34  | 542.15 | 10.8  | 538.58 | 5.4  | 541.14 | 8.42  |
| 35  | 540.41 | 9.06  | 540.22 | 7.24 | 543.52 | 10.16 |
| 36  | 533.36 | 2.01  | 538.12 | 5.14 | 537.75 | 4.39  |
| 37  | 545.97 | 14.62 | 541.23 | 8.25 | 536.93 | 3.57  |
| 38  | 536.2  | 4.85  | 538.58 | 5.6  | 536.29 | 2.93  |
| 39  | 540.59 | 9.24  | 536.02 | 3.04 | 536.29 | 2.93  |
| 40  | 534    | 2.65  | 535.56 | 2.58 | 537.02 | 3.66  |
| 41  | 538.46 | 7.42  | 535.06 | 2.57 | 534.69 | 3.24  |
| 42  | 536.03 | 4.68  | 537.75 | 4.77 | 544.98 | 11.62 |
| 43  | 534.36 | 3.01  | 537.57 | 4.59 | 536.29 | 2.93  |
| 44  | 534.37 | 3.38  | 535.19 | 2.47 | 533.91 | 2.56  |
| 45  | 533.55 | 2.56  | 535.19 | 2.47 | 534.39 | 3.04  |
| 46  | 537.02 | 6.03  | 535.02 | 2.3  | 535.17 | 3.82  |
| 47  | 533.55 | 2.56  | 535.69 | 2.97 | 536.32 | 4.97  |
| 48  | 535.56 | 4.57  | 535.36 | 2.64 | 535.89 | 4.54  |

|       |        |       |        |       |        |       |
|-------|--------|-------|--------|-------|--------|-------|
| 49    | 533.36 | 2.37  | 535.74 | 3.02  | 533.79 | 2.44  |
| 50    | 533.18 | 2.19  | 535.24 | 2.52  | 534.82 | 3.47  |
| 51    | 535.38 | 4.39  | 534.74 | 2.02  | 534.66 | 3.31  |
| 52    | 533.3  | 2.13  | 534.73 | 2.64  | 536.06 | 3.05  |
| 53    | 533.69 | 2.52  | 535.35 | 3.26  | 536.77 | 3.76  |
| 54    | 535.83 | 4.66  | 535.02 | 2.93  | 537.88 | 4.87  |
| 55    | 539.64 | 8.47  | 535.43 | 3.34  | 539.65 | 6.64  |
| 56    | 539.91 | 8.74  | 535.88 | 3.79  | 539.21 | 6.2   |
| 57    | 539.89 | 8.72  | 535.51 | 3.42  | 539.6  | 6.59  |
| 58    | 537.32 | 6.15  | 537.74 | 5.65  | 535.06 | 2.05  |
| 59    | 534.45 | 3.28  | 534.93 | 2.84  | 535.48 | 2.47  |
| 60    | 533.43 | 2.39  | 534.56 | 2.26  | 535.08 | 4.03  |
| Neg 1 | 529.34 | -2.01 | 531.58 | -0.83 | 528.42 | -2.84 |
| Neg 2 | 529.24 | -2.11 | 529.82 | -2.59 | 530.49 | -0.77 |
| Neg 3 | 529.91 | -1.13 | 531.89 | -0.6  | 530.79 | -0.66 |
| Neg 4 | 528.78 | -2.26 | 531.77 | -0.72 | 529.28 | -2.17 |
| Neg 5 | 531.02 | -0.02 | 530.79 | -1.7  | 530.16 | -1.29 |
| PBS   | 530.16 | -1.19 | 530.07 | -2.34 | 528.98 | -2.28 |

\*Wavelength difference from respective values of the antibody step.

Neg = Negative samples

° PVC-2a

† PVC-2b

• PVC-2c

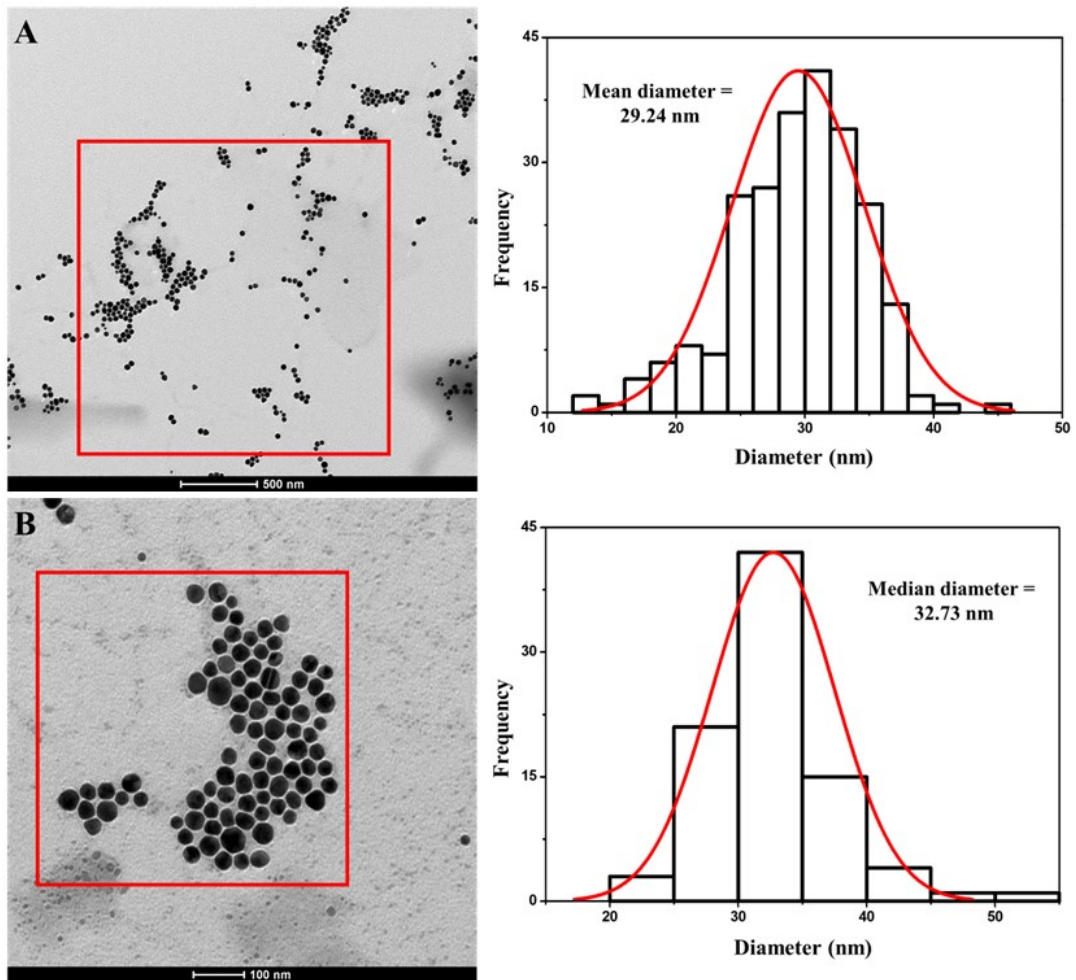

**Fig. S3** TEM images and size analyses. A) AuNPs@MUA@EDC/NHS@immunoglobulins complex with at 500 nm scale and size analyses. B) AuNPs@MUA@EDC/NHS@immunoglobulins@parvovirus complex and size analyses.

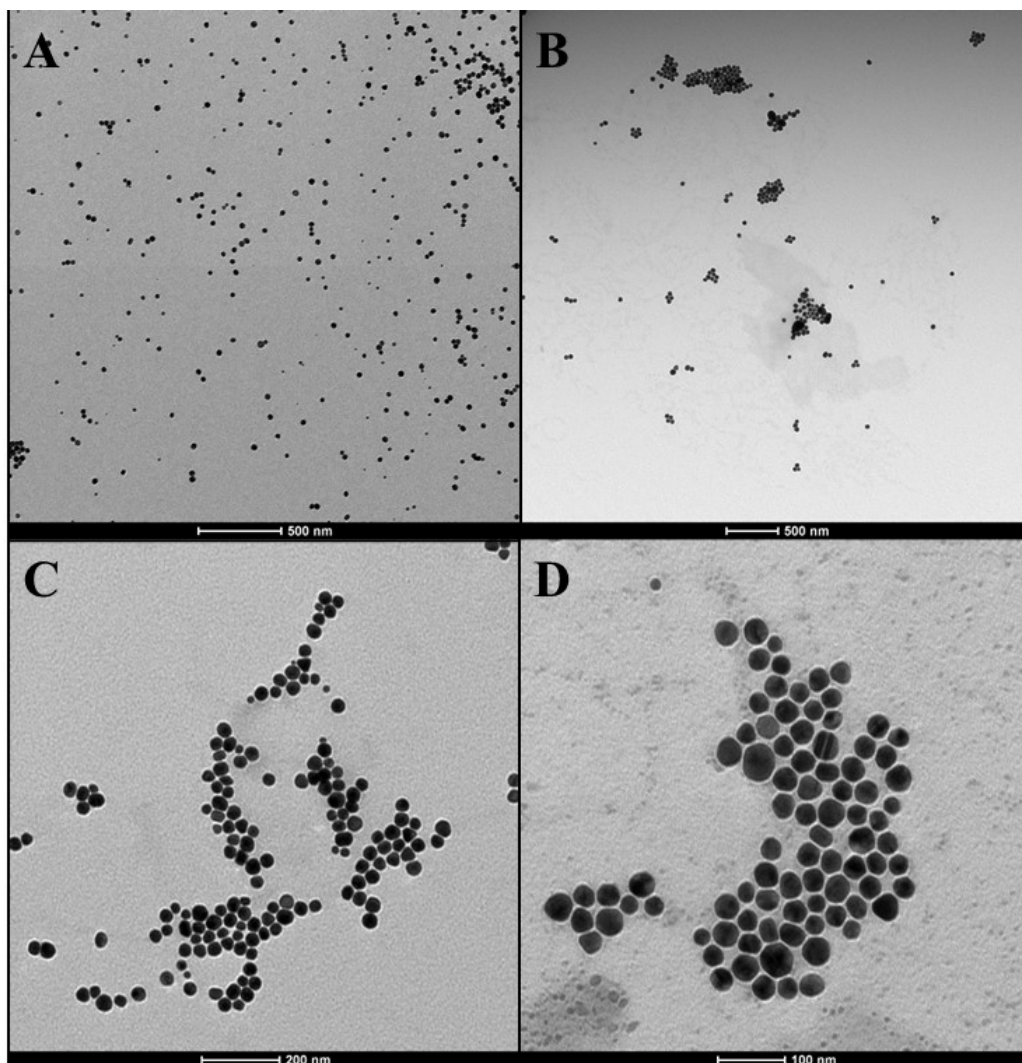

**Fig. S4** MET images. A) AuNPs at 500 nm scale with approximately 23 nm in diameter. B) Formation step of the AuNPs@MUA@EDC/NHS complex at 500 nm scale. C) The complex AuNPs@MUA@EDC/NHS@immunoglobulins at 200 nm scale. D - Addition of a positive sample forming the complex AuNPs@MUA@EDC/NHS@immunoglobulins@parvovirus at 100 nm scale.
