# Supplementary figures and images for: Canine parvovirus 2 detection using a LSPR biosensing method with gold nanoparticles
Source: Royal Society of Chemistry journal article supplement (doi:10.1039/d2sd00114d), 2022-10-13

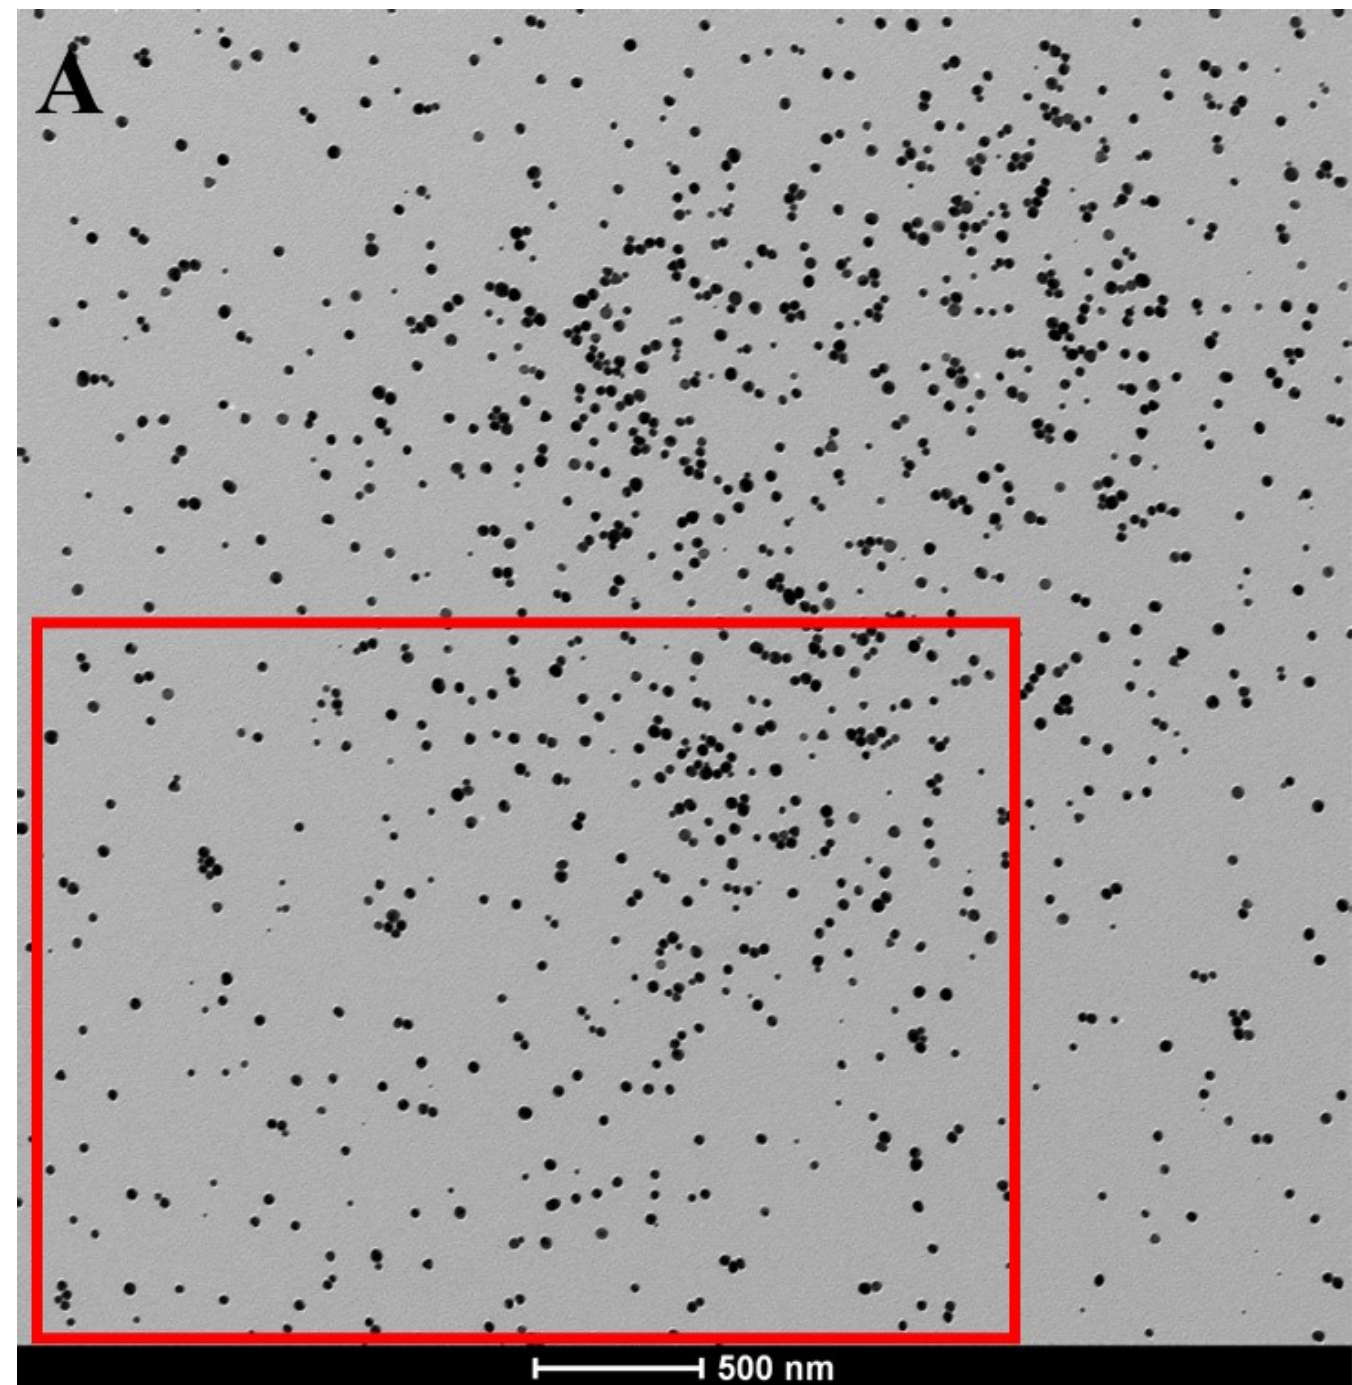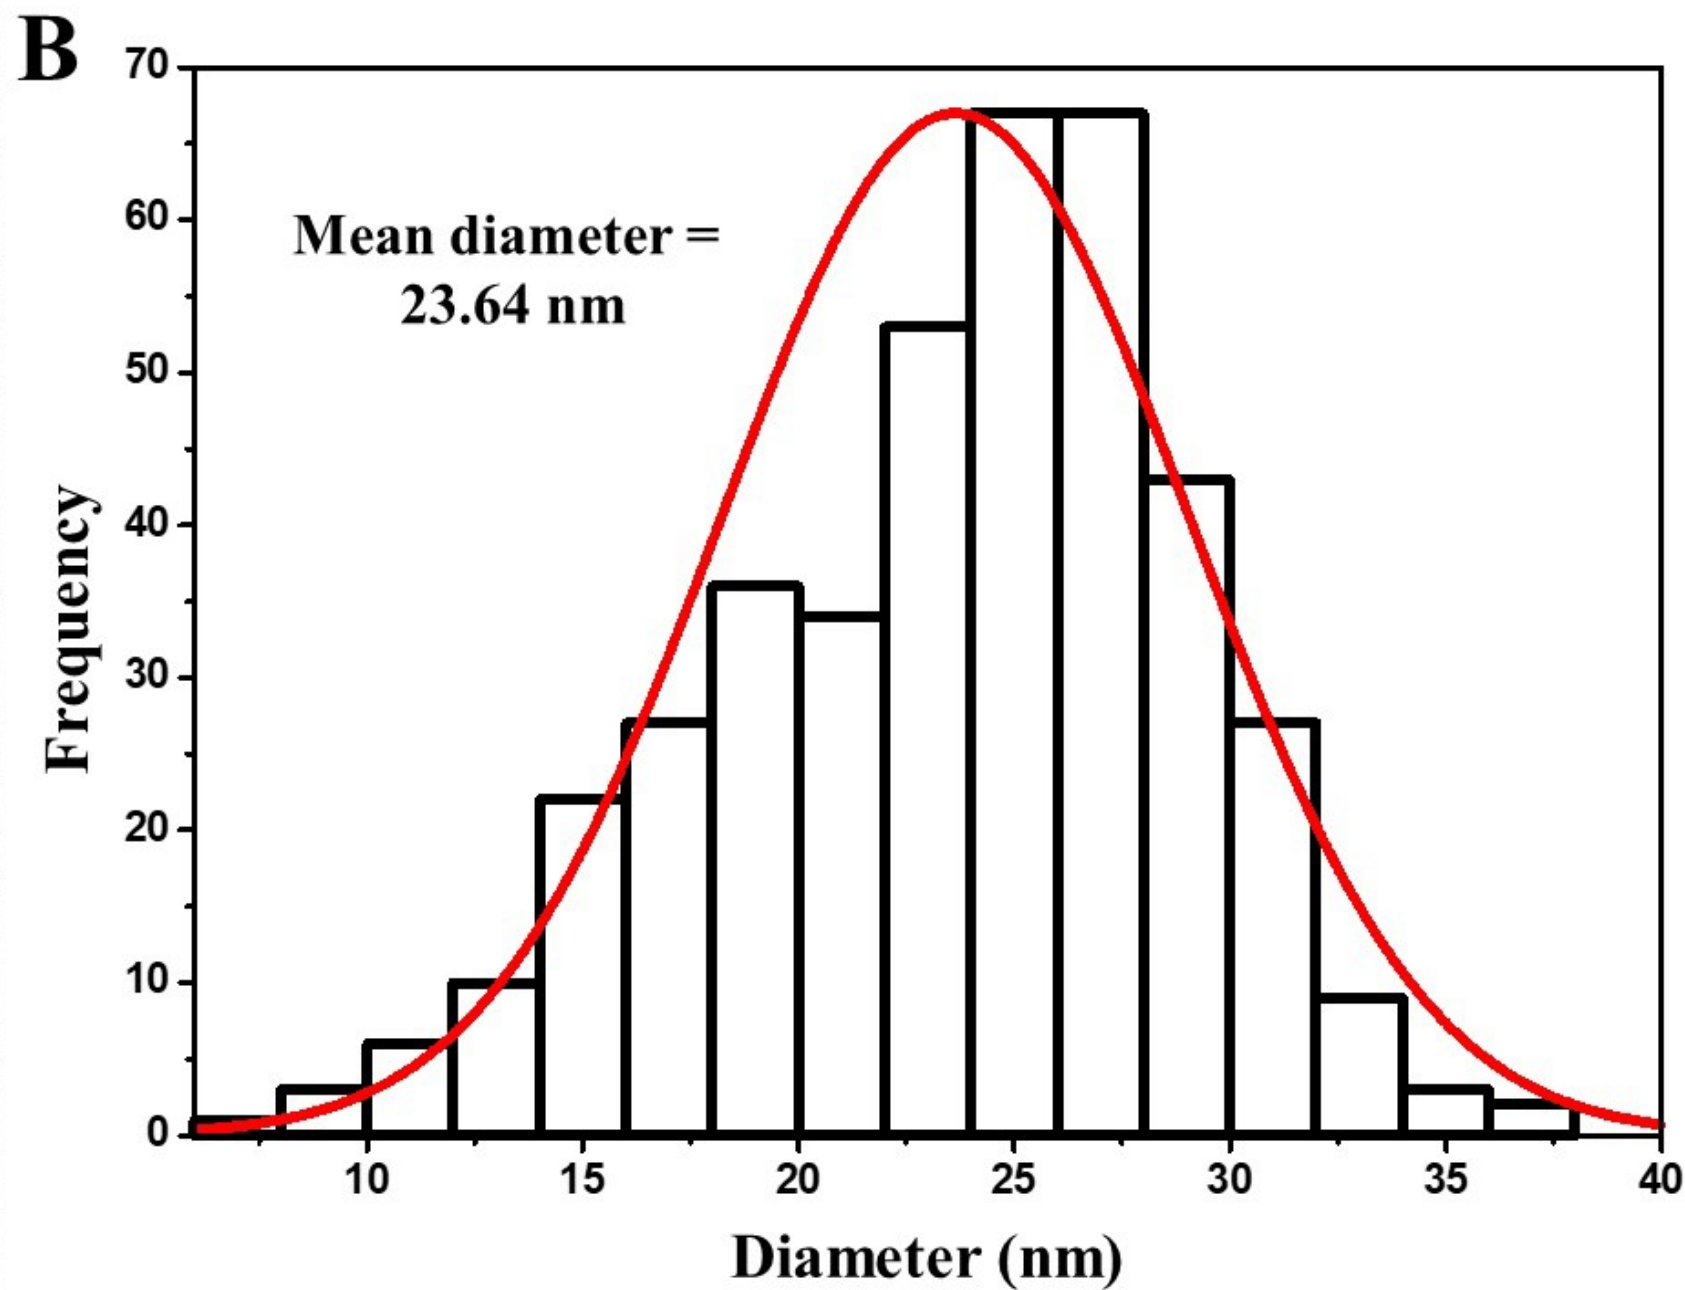

Supplement: d2sd00114d2.pdf [file d2sd00114d2.pdf]

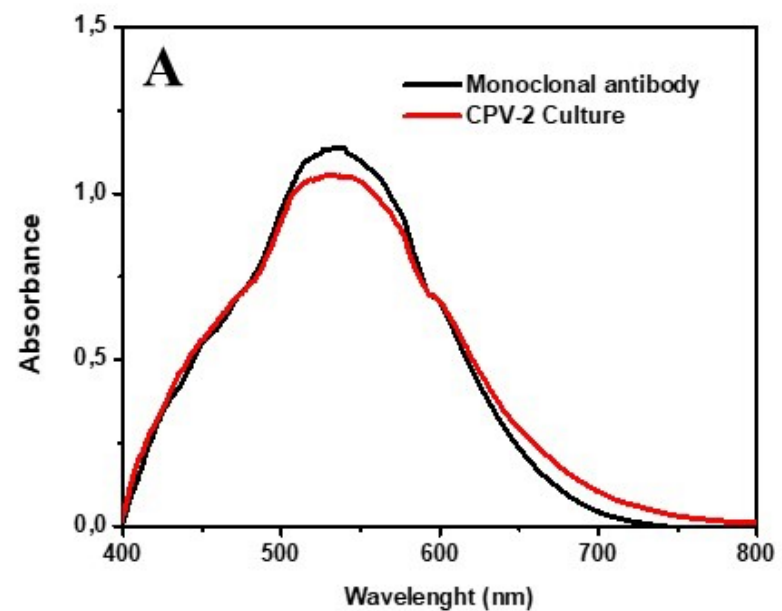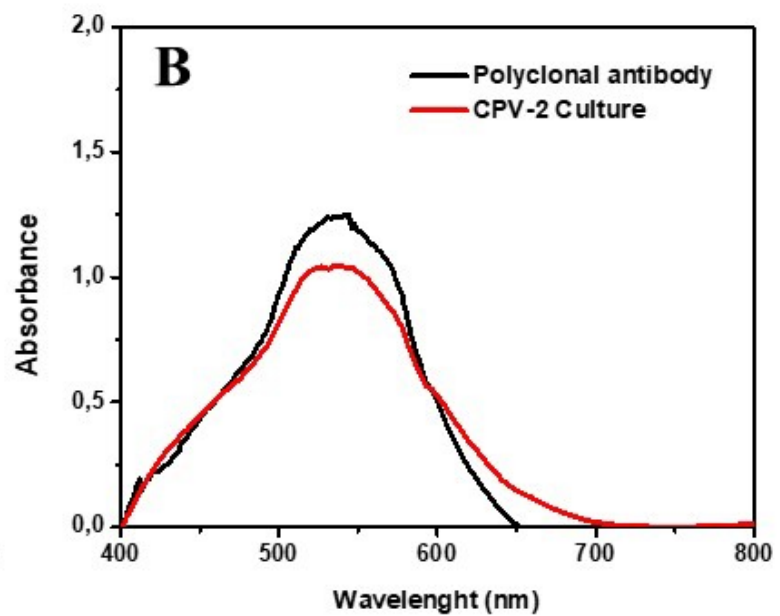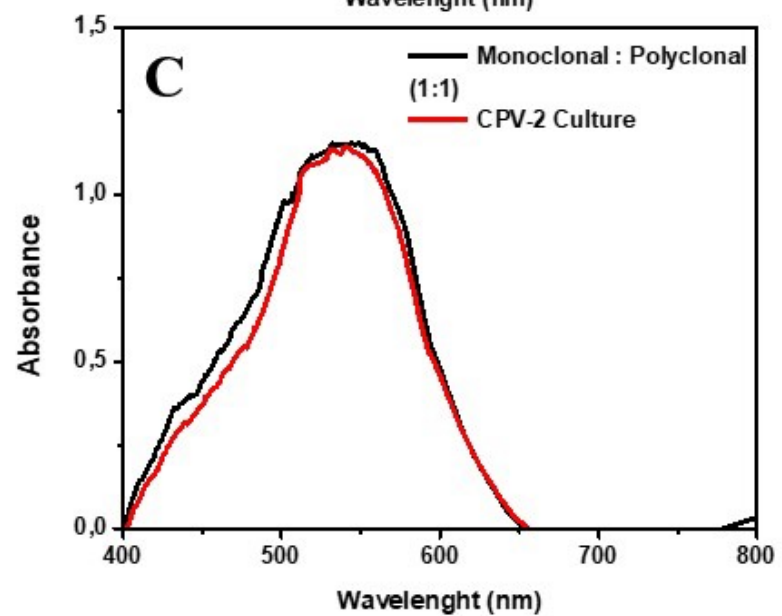

Supplement: d2sd00114d3.pdf [file d2sd00114d3.pdf]

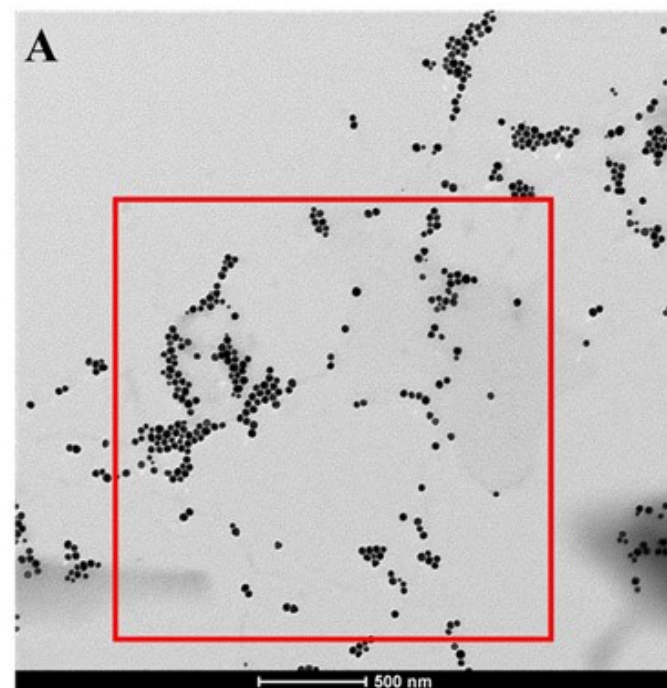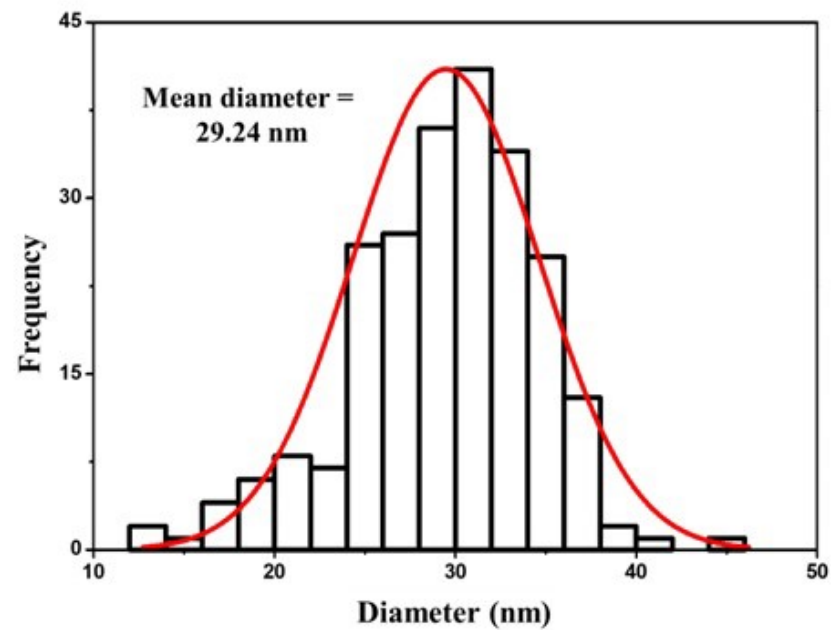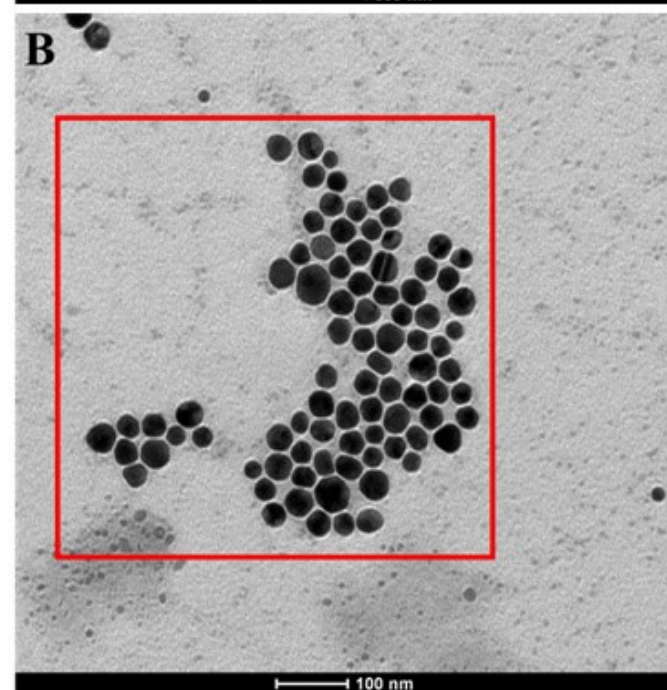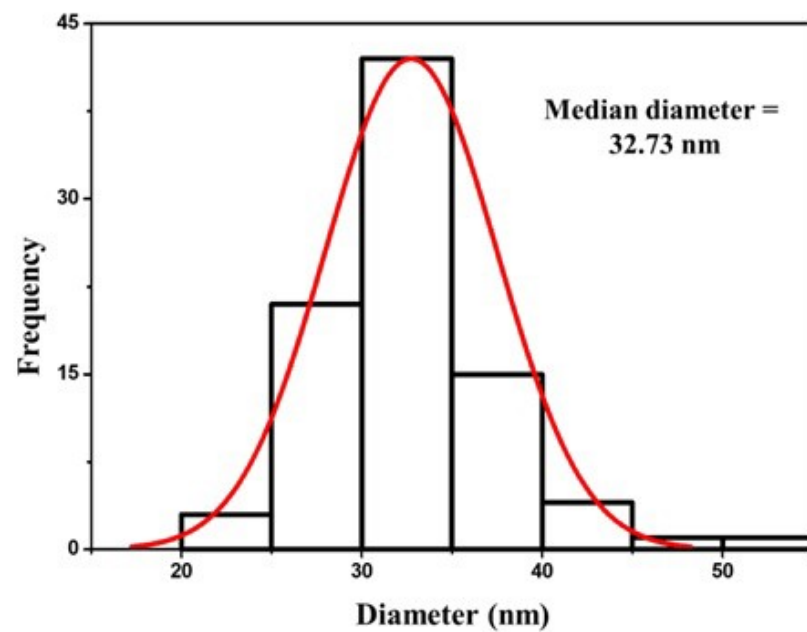

Supplement: d2sd00114d4.pdf [file d2sd00114d4.pdf]

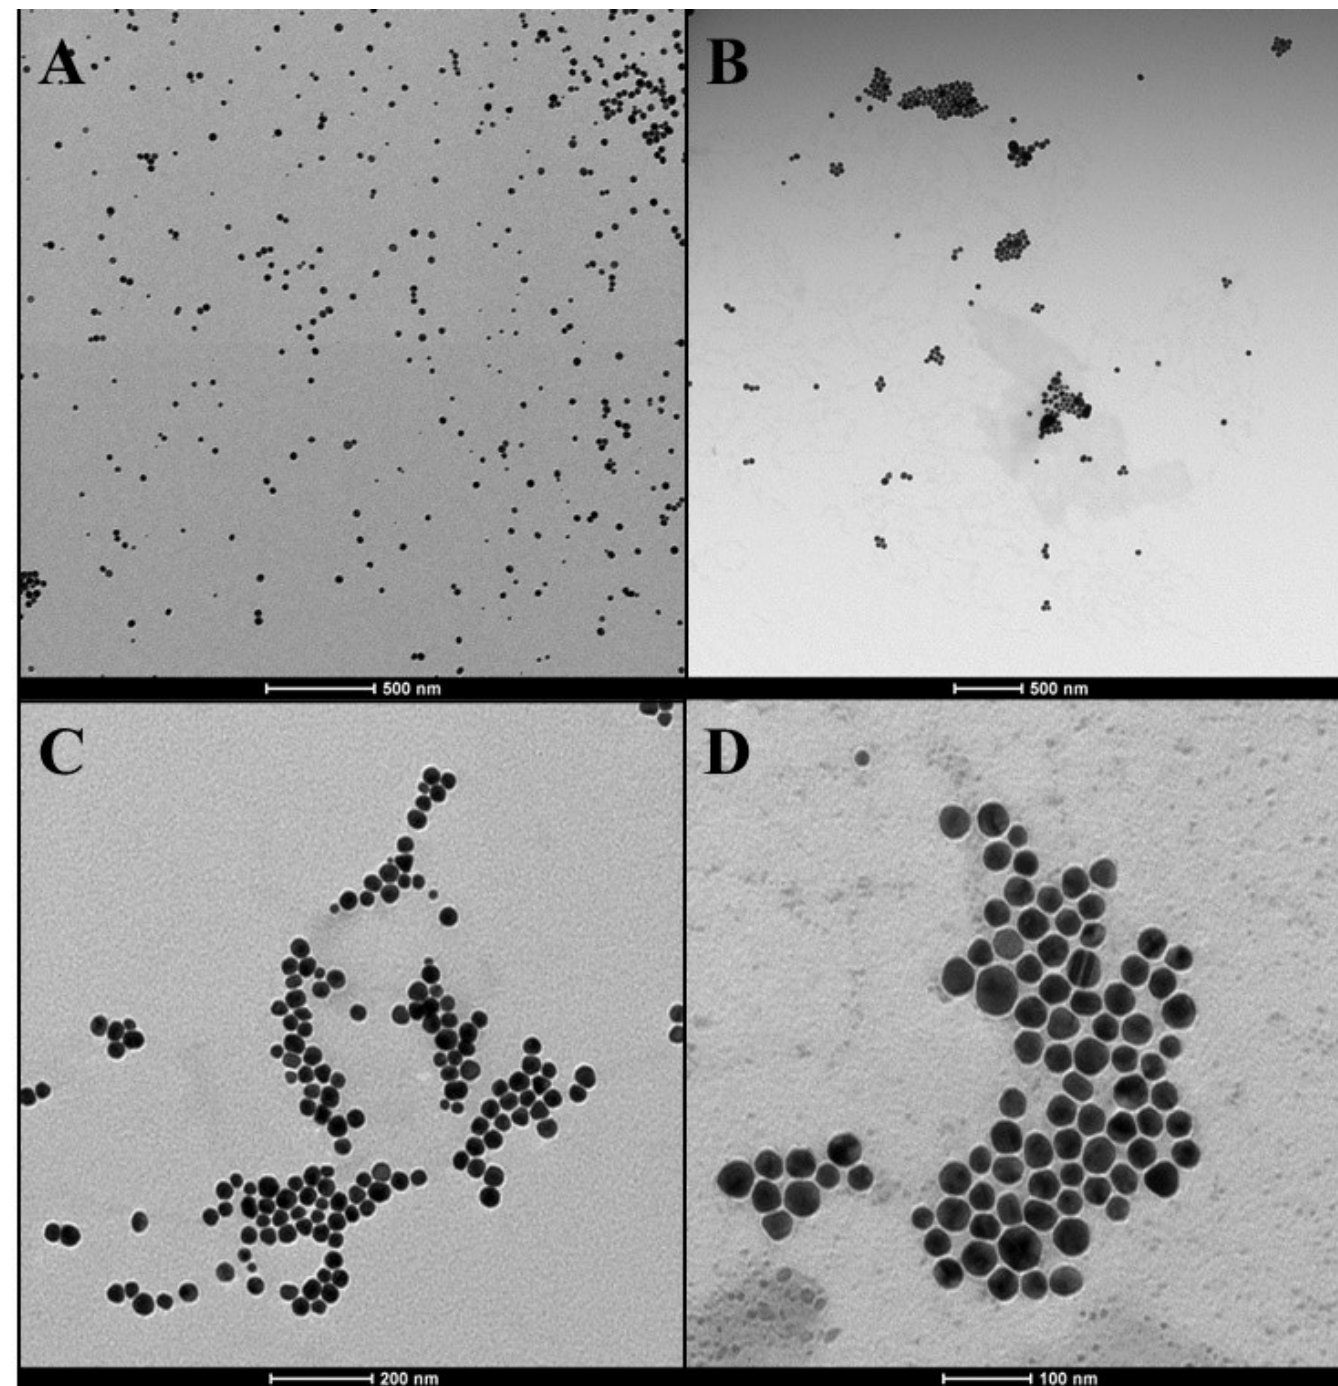

Supplement: d2sd00114d5.pdf [file d2sd00114d5.pdf]
